# Supplementary material for: Guanylate-Binding Protein 1 Regulates Infection-Induced Autophagy through TBK1 Phosphorylation
Source: Hindawi journal article supplement (doi:10.1155/2022/8612113), 2022-05-29

# Supplementary Figure 4

A

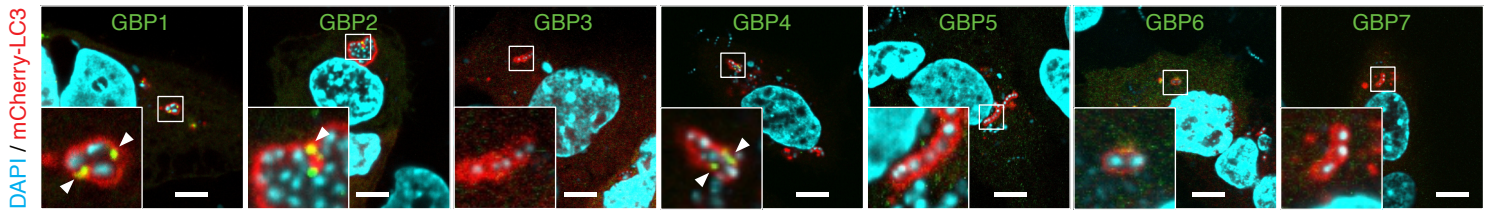

B

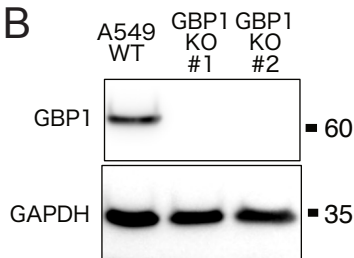

D

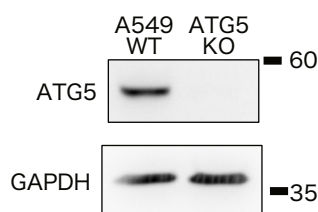

C

hGBP1\_CDS 286 345

```

A549 WT ATCCTTTCTGCCATTACACAGCCTATGGTGGTGGTGGCAATTGTGGGCCTCTACCGCACA
A549 GBP1KO #1 ATCCTTTCTGCCATTACACAGCCTAT-----TGGTGGCAATTGTGGGCCTCTACCGCACA
A549 GBP1KO #2 ATCCTTTCTGCCATTACACAGCCTAT--TGGTGGTGGCAATTGTGGGCCTCTACCGCACA
    
```

E

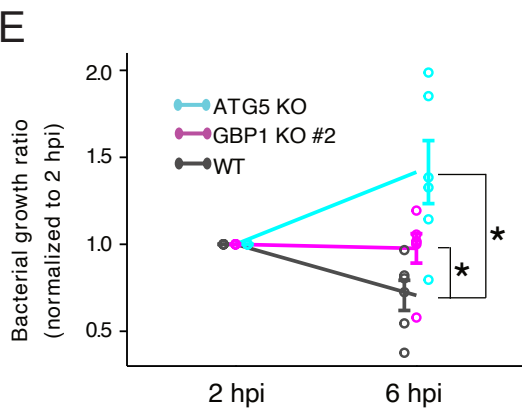

F

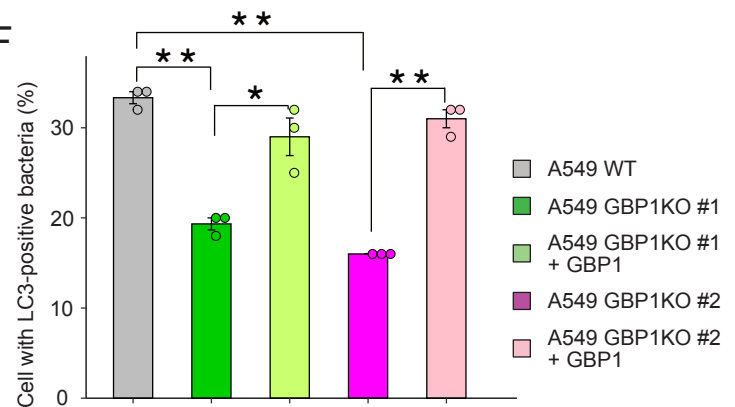

G

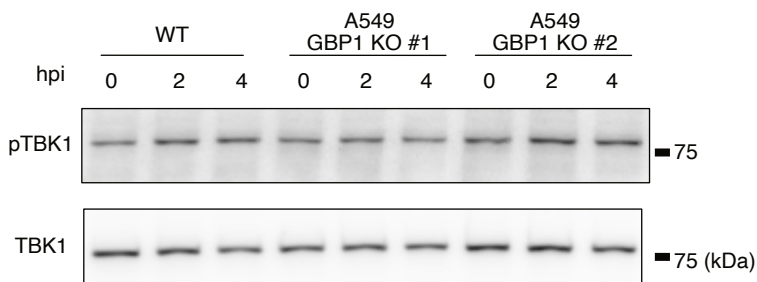

H

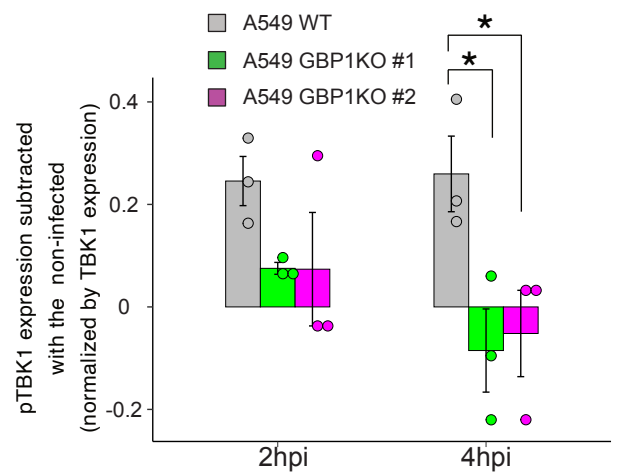

Supplement: f4 [file 8612113.f4.pdf]
