# Supplementary figures and images for: Guanylate-Binding Protein 1 Regulates Infection-Induced Autophagy through TBK1 Phosphorylation
Source: Hindawi journal article supplement (doi:10.1155/2022/8612113), 2022-05-29

# Supplementary Figure 1

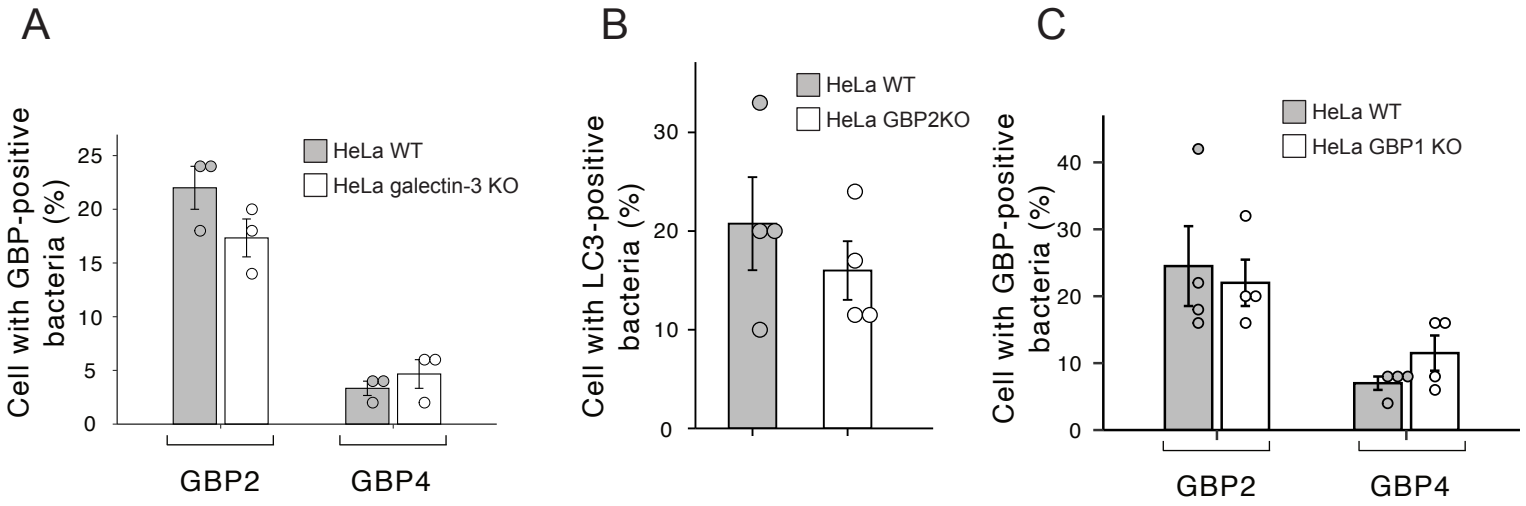

Supplement: f1 [file 8612113.f1.pdf]

# Supplementary Fig. 2

A

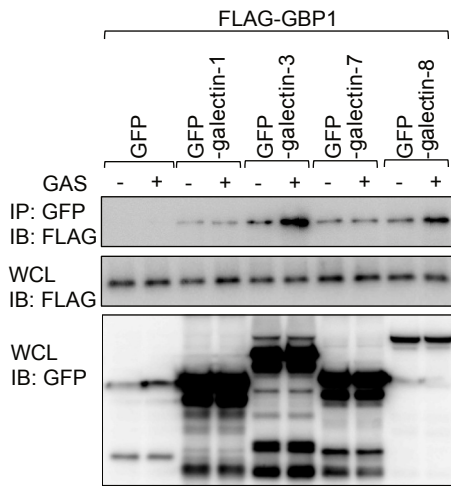

Supplement: f2 [file 8612113.f2.pdf]

# Supplementary Figure 3

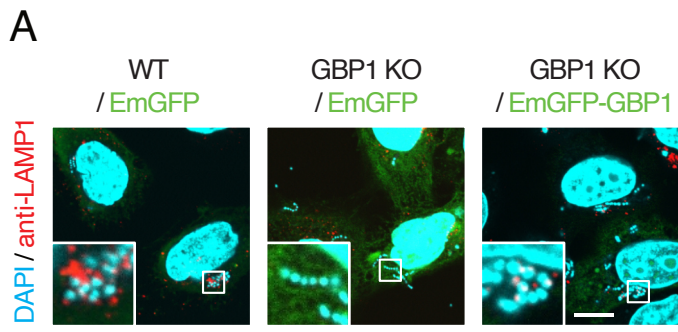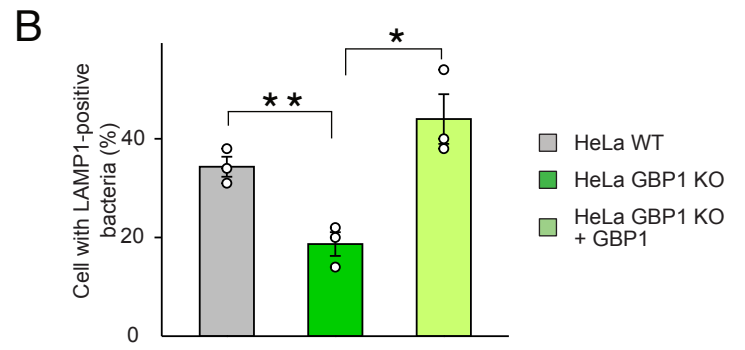

Supplement: f3 [file 8612113.f3.pdf]

# Supplementary Figure 5

A

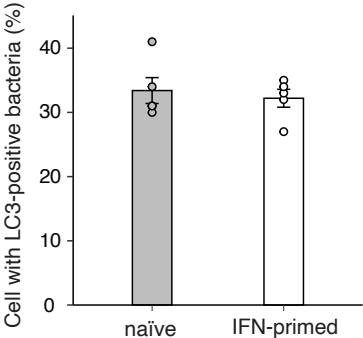

Supplement: f5 [file 8612113.f5.pdf]

# Supplementary Figure 6

## A

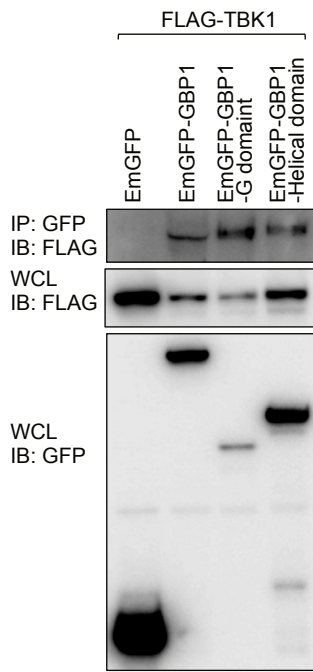

Supplement: f6 [file 8612113.f6.pdf]
